# Supplementary material for: Defect-Induced Efficient Heteroepitaxial Growth of Single-Wall Carbon Nanotubes @ Hexagonal Boron Nitride Films
Source: MDPI journal article supplement (doi:10.3390/ma16051864), 2023-02-24
Supplement: s1 [file s1]

# Defect-Induced Efficient Heteroepitaxial Growth of Single-Wall Carbon Nanotubes @ Hexagonal Boron Nitride Films

Changping Yu <sup>1,2</sup>, Lili Zhang <sup>1,2</sup>, Gang Zhou <sup>3</sup>, Feng Zhang <sup>1,2,\*</sup>, Zichu Zhang <sup>1,2</sup>, Anping Wu <sup>1</sup>, Pengxiang Hou <sup>1,2</sup>, Huiming Cheng <sup>1,4</sup> and Chang Liu <sup>1,2,\*</sup>

## SUPPLEMENTARY MATERIAL

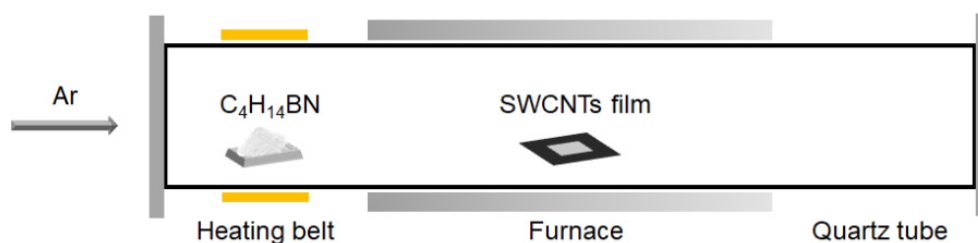

Figure S1. Schematic of the APCVD apparatus used to synthesize SWCNT@h-BN.

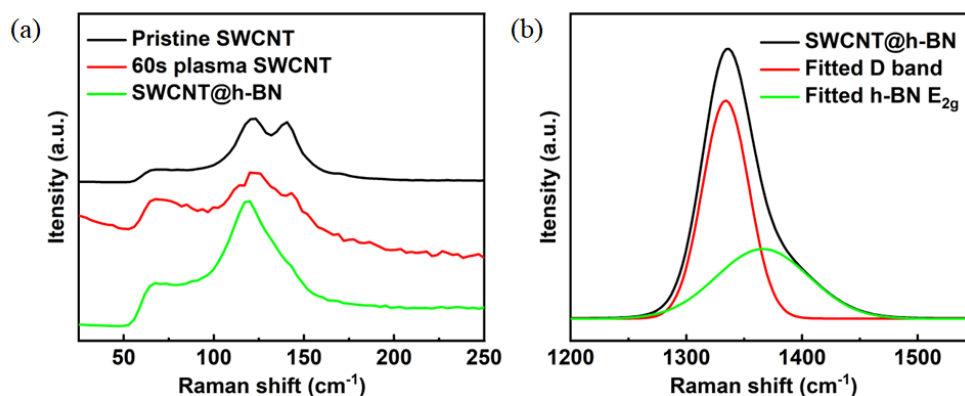

Figure S2. (a) RBM Raman spectra of pristine SWCNTs, plasma-treated SWCNTs, and SWCNT@h-BN, (b) D band Raman spectrum of SWCNT@h-BN excited by 532 nm laser.

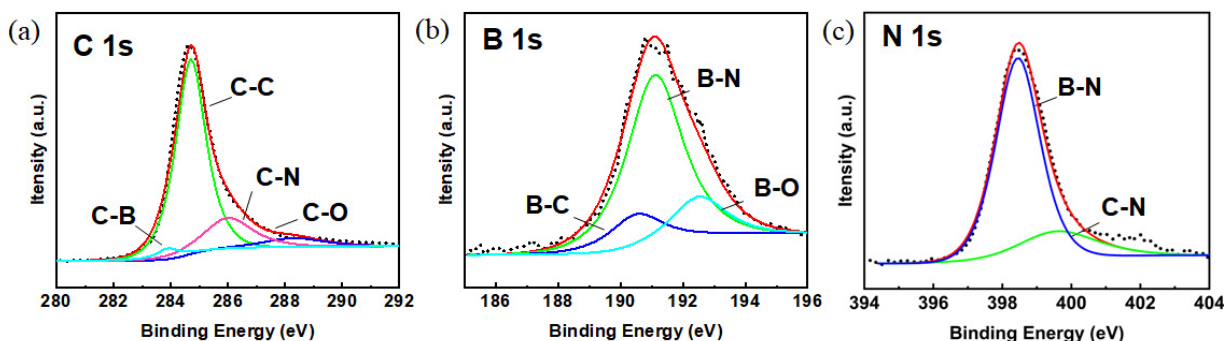

Figure S3. XPS spectra of SWCNT@h-BN. (a) C 1s, (b) B 1s, and (c) N 1s.

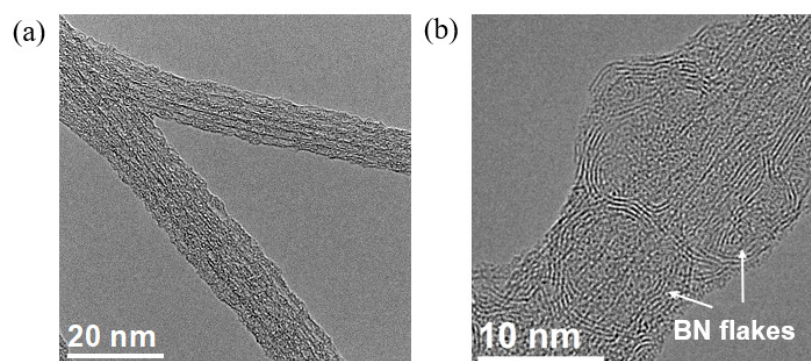

**Figure S4.** TEM images of (a) SWCNT film after 60 s-plasma treatment, (b) SWCNT@h-BN film obtained using SWCNTs shown in (a) as a template.

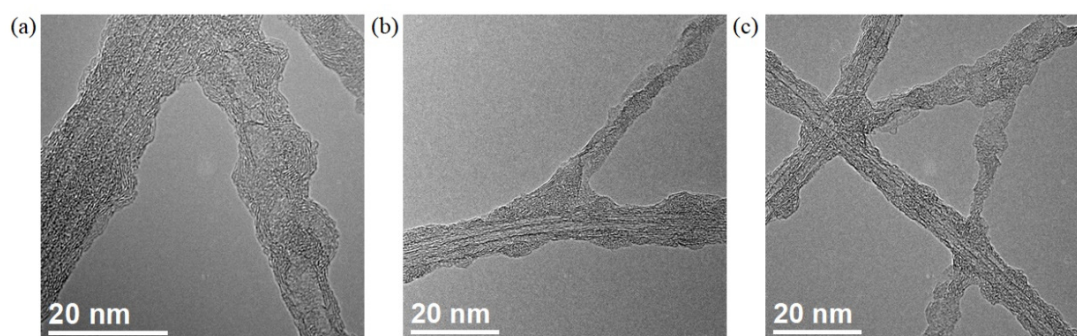

**Figure S5.** TEM images of the SWCNT@h-BN were synthesized at different temperatures of (a) 900 °C, (b) 1000 °C, and (c) 1100 °C.

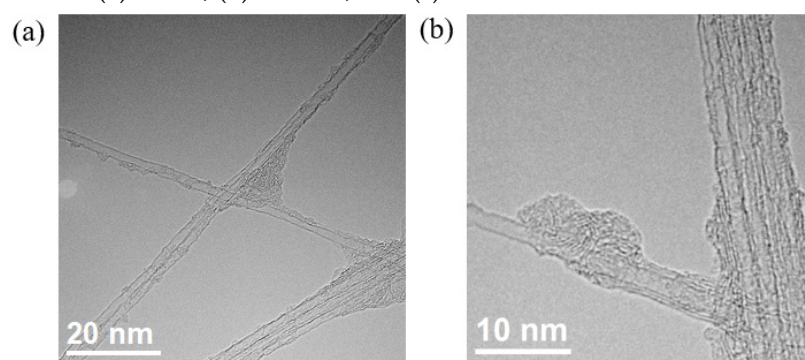

**Figure S6.** TEM images of SWCNT@h-BN grown from SWCNTs without plasma treatment.

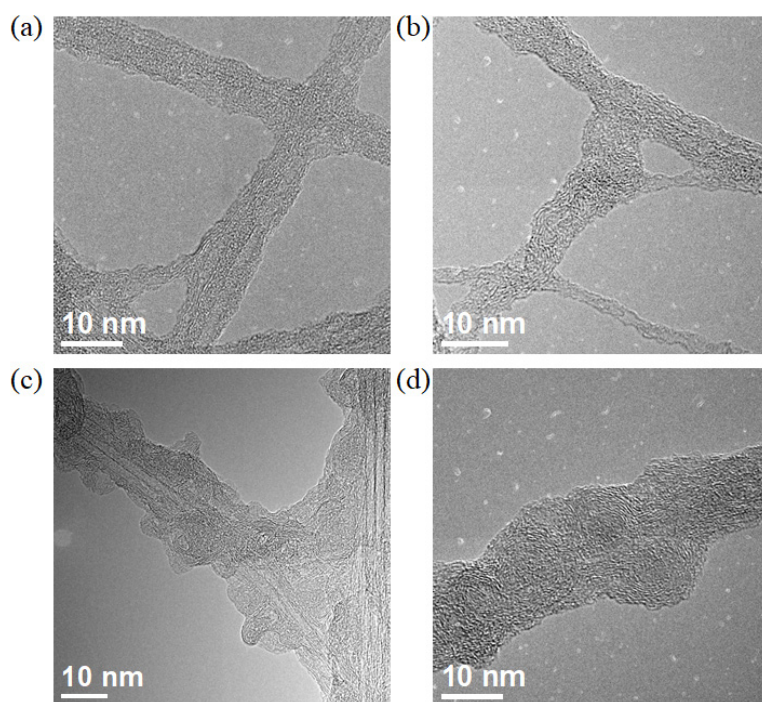

**Figure S7.** TEM images of the SWCNT@h-BN experienced growth times of (a) 5 min, (b) 15 min, (c) 30 min, and (d) 120 min.

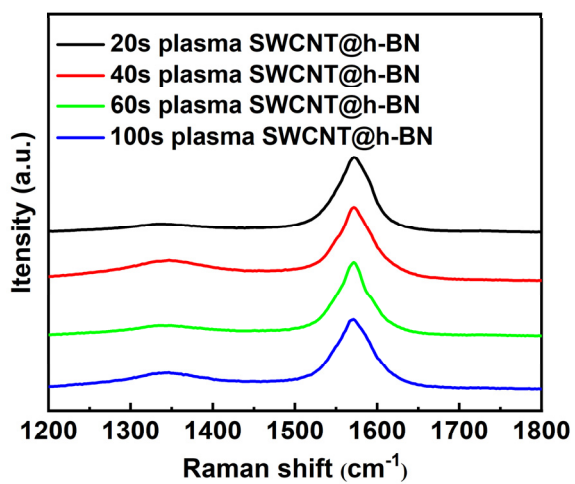

**Figure S8.** D and G bands Raman spectra of the SWCNT@h-BN synthesized using SWCNT templates experienced different plasma treatment time as a template.
